# Supplementary material
Source: MDPI journal article supplement (https://www.mdpi.com/1424-2818/15/2/294)
Supplement: s1 [file s1]

**Figure S1:** Photos of representative study sites A) grasslands B) shrublands C) planted forests

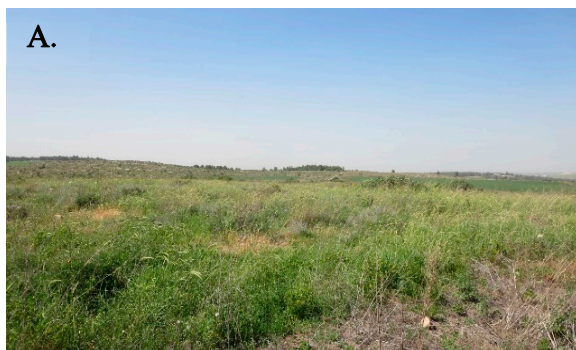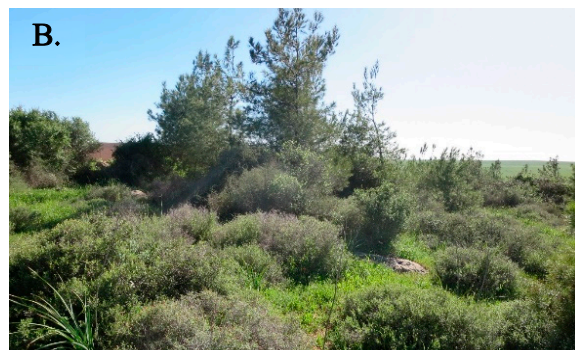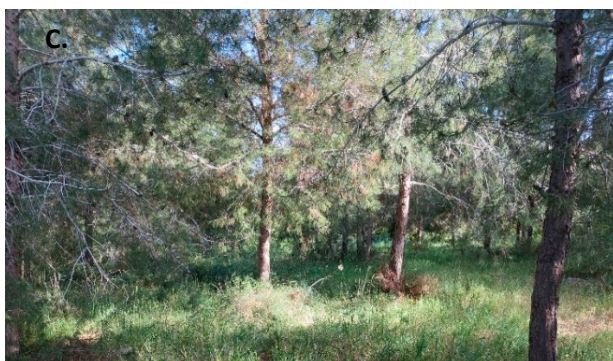

**Table S1:** Study plot information

| Plot Name                 | Habitat Type   | Coordinates (Israeli Transverse Mercator) | Uncultivated area at 100m radii (1000m <sup>2</sup> ) | Uncultivated area at 500m radii (1000m <sup>2</sup> ) | Uncultivated area at 1000m radii (1000m <sup>2</sup> ) | Area of uncultivated patch (1000m <sup>2</sup> ) |
|---------------------------|----------------|-------------------------------------------|-------------------------------------------------------|-------------------------------------------------------|--------------------------------------------------------|--------------------------------------------------|
| Beit Govrin 1 (BG1)       | Planted Forest | N31.86489<br>E34.935678                   | 57.42                                                 | 39.78                                                 | 41.15                                                  | 88.02                                            |
| Beit Govrin 2 (BG2)       | Planted Forest | N31.85757<br>E34.985302                   | 49.49                                                 | 31.33                                                 | 34.52                                                  | 76.85                                            |
| Beit Govrin 3 (BG3)       | Planted Forest | N31.78897<br>E34.873174                   | 56.98                                                 | 36.08                                                 | 39.37                                                  | 76.85                                            |
| Beit Govrin 4 (BG4)       | Grassland      | N31.82919<br>E34.870486                   | 61.71                                                 | 29.47                                                 | 36.00                                                  | 86.97                                            |
| Hulda 1 (HU1)             | Planted Forest | N31.679805<br>E34.844298                  | 53.82                                                 | 19.07                                                 | 19.73                                                  | 24.21                                            |
| Hulda 2 (HU2)             | Grassland      | N31.841735<br>E34.953967                  | 32.75                                                 | 16.55                                                 | 13.52                                                  | 60.84                                            |
| Kfar Menachem 1(KM1)      | Shrubland      | N31.814163<br>E34.88045                   | 68.15                                                 | 19.41                                                 | 20.91                                                  | 29.13                                            |
| Kfar Menachem 2 (KM2)     | Planted Forest | N31.851238<br>E34.991359                  | 49.32                                                 | 31.83                                                 | 19.91                                                  | 48.59                                            |
| Mishmar David 1 (MD1)     | Grassland      | N31.747411<br>E34.842132                  | 53.40                                                 | 31.24                                                 | 20.64                                                  | 57.52                                            |
| Mishmar David 2 (MD2)     | Grassland      | N31.634838<br>E34.886551                  | 44.61                                                 | 12.96                                                 | 15.87                                                  | 74.3                                             |
| Nahshon 1 (NA1)           | Planted Forest | N31.756569<br>E34.854881                  | 57.54                                                 | 53.64                                                 | 41.51                                                  | 73.05                                            |
| Nahshon 2 (NA2)           | Planted Forest | N31.602037<br>E34.868908                  | 58.24                                                 | 39.97                                                 | 51.94                                                  | 123                                              |
| Netiv HaLamed-Heh 1 (NL1) | Grassland      | N31.679815<br>E34.996296                  | 50.44                                                 | 43.47                                                 | 51.00                                                  | 34.41                                            |
| Netiv HaLamed Heh 2 (NL2) | Grassland      | N31.8205<br>E34.890915                    | 61.06                                                 | 20.67                                                 | 21.06                                                  | 47.6                                             |
| Shaalavim 1 (SH1)         | Grassland      | N31.832395<br>E34.865079                  | 67.39                                                 | 40.66                                                 | 34.71                                                  | 343.81                                           |
| Shaalavim 3 (SH3)         | Grassland      | N31.627241<br>E34.885012                  | 21.48                                                 | 17.17                                                 | 25.40                                                  | 19.44                                            |
| Shaalavim 4 (SH4)         | Planted Forest | N31.607181<br>E34.866469                  | 45.31                                                 | 26.08                                                 | 28.28                                                  | 63.14                                            |
| Shaalavim 5 (SH5)         | Grassland      | N31.618879<br>E34.853685                  | 58.59                                                 | 31.34                                                 | 42.01                                                  | 198.34                                           |
| Tal Shachar 1 (TS1)       | Shrubland      | N31.597754<br>E34.883518                  | 62.49                                                 | 50.40                                                 | 46.88                                                  | 516.6                                            |

|                       |                |                          |       |       |       |       |
|-----------------------|----------------|--------------------------|-------|-------|-------|-------|
| Tal Shachar 2 (TS2)   | Shrubland      | N31.815352E<br>34.923495 | 66.11 | 47.69 | 38.26 | 516.6 |
| Beit Nir 1 (BN1)      | Shrubland      | N31.815772E<br>34.929333 | 56.83 | 56.65 | 60.19 | 299   |
| Beit Nir 2 (BN2)      | Shrubland      | N31.842777E<br>34.987128 | 47.95 | 61.94 | 53.21 | 61    |
| Gal'on 1 (GAL1)       | Shrubland      | N31.777244E<br>34.84797  | 57.30 | 86.28 | 58.05 | 64    |
| Kfar Menachem 3 (KM3) | Shrubland      | N31.675464E<br>34.992184 | 46.80 | 16.25 | 9.46  | 33    |
| Karmeit Yosef 1 (KY1) | Planted Forest | N31.61001<br>E34.860744  | 61.89 | 58.12 | 15.62 | 331   |
| Nahshon 3 (NA3)       | Grassland      | N31.794362E<br>34.890562 | 41.45 | 27.59 | 25.19 | 55    |
| Revadim 1 (R1)        | Grassland      | N31.682822E<br>34.848616 | 25.53 | 34.83 | 14.49 | 18    |
| Revadim 2 (R2)        | Grassland      | N31.79029<br>E34.894271  | 59.62 | 28.65 | 30.14 | 33    |
| Tel Zafit 1 (TZ1)     | Shrubland      | N31.86827<br>E34.976905  | 63.29 | 47.55 | 20.31 | 193   |
| Tel Zafit 2 (TZ2)     | Shrubland      | N31.761718E<br>34.854044 | 57.60 | 28.02 | 17.44 | 40    |

**Figure S2:** Study plot set up (not to scale)

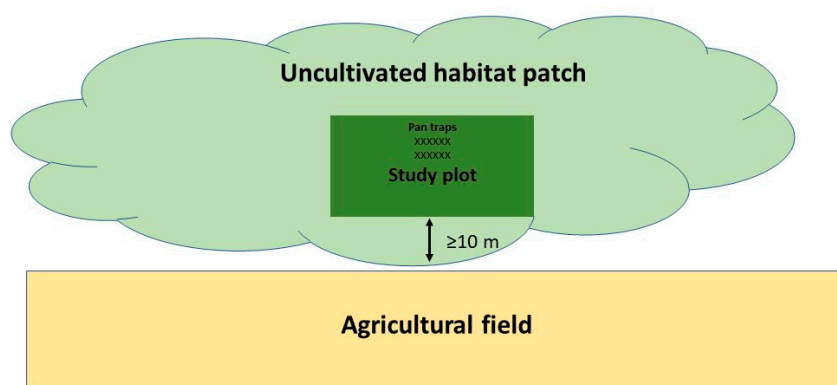

**Table S2:** Bee species sampled in the study, grouped by families

| <b>Andrenidae</b>                       | <b>Apidae</b>                           | <b>Colletidae</b>           |
|-----------------------------------------|-----------------------------------------|-----------------------------|
| <i>Andrena Aciandrena</i> sp. 1         | <i>Anthophora agama</i>                 | <i>Colletes alfkeni</i>     |
| <i>Andrena Aciandrena</i> sp. 2         | <i>Anthophora</i> cf. <i>caheles</i>    | <i>Hylaeus albonotatus</i>  |
| <i>Andrena aeneiventris</i>             | <i>Anthophora crinipes</i>              | <i>Hylaeus araxanus</i>     |
| <i>Andrena aerinifrons levantina</i>    | <i>Anthophora dispar</i>                | <i>Hylaeus cornutus</i>     |
| <i>Andrena alfkenelloides cardalia</i>  | <i>Anthophora dufourii</i>              | O                           |
| <i>Andrena aruana</i>                   | <i>Anthophora plumipes</i>              | <i>Hylaeus intermedius</i>  |
|                                         | <i>Eucera</i> sp. <i>eucnemidea</i>     |                             |
| <i>Andrena astica</i>                   | group                                   | <i>Hylaeus kahri</i>        |
| <i>Andrena bassana</i>                  | <i>Eucera</i> sp. <i>seminuda</i> group | <i>Hylaeus lineolatus</i>   |
| <i>Andrena bisulcata/chaetogastra</i>   | <i>Eucera spinipes</i>                  | <i>Hylaeus moricei</i>      |
| <i>Andrena brumanensis</i>              | <i>Eucera syriaca</i>                   | <i>Hylaeus orientalicus</i> |
| <i>Andrena butea</i>                    | <i>Eucera wolffi</i>                    | <i>Hylaeus punctatus</i>    |
| <i>Andrena caspica</i>                  | <i>Nomada basalis</i>                   | <i>Hylaeus scutellatus</i>  |
| <i>Andrena Chlorandrena</i> sp. 1       | <i>Nomada cherkesiana</i>               | <i>Hylaeus sidensis</i>     |
| <i>Andrena Chlorandrena</i> sp. 2       | <i>Nomada crenulata</i>                 | <i>Hylaeus soror</i>        |
| <i>Andrena cinereophila</i>             | <i>Nomada femoralis</i>                 | <i>Hylaeus stellatus</i>    |
| <i>Andrena colletiformis</i>            | <i>Nomada filicornis</i>                | <i>Hylaeus syriacus</i>     |
| <i>Andrena combusta ochraceohirta</i>   | <i>Nomada flavoguttata</i>              |                             |
| <i>Andrena danini</i>                   | <i>Nomada glaucopis</i>                 | <i>Hylaeus taeniolatus</i>  |
| <i>Andrena dauma</i>                    | <i>Nomada israelis</i>                  | <i>Hylaeus trifidus</i>     |
| <i>Andrena elmaria</i>                  | <i>Nomada lapillula</i>                 |                             |
| <i>Andrena Euandrena</i> sp. 1          | <i>Nomada limassolica</i>               |                             |
| <i>Andrena falcinella</i>               | <i>Nomada nobilis</i>                   |                             |
| <i>Andrena fimbriatoides</i>            | <i>Nomada ottomanensis</i>              |                             |
| <i>Andrena flavipes</i>                 | <i>Nomada propinqua</i>                 |                             |
| <i>Andrena florea</i>                   | <i>Nomada puncticeps</i>                |                             |
| <i>Andrena fuligula</i>                 | <i>Nomada rubiginosa</i>                |                             |
| <i>Andrena fulvitarsis</i>              | <i>Nomada rubricollis</i>               |                             |
| <i>Andrena glareola</i>                 | <i>Nomada scheuchli</i>                 |                             |
|                                         | <i>Nomada</i> sp.17, aff.               |                             |
| <i>Andrena hesperia</i>                 | <i>trispinosa</i>                       |                             |
| <i>Andrena hyemala repressa</i>         | <i>Nomada</i> sp.2                      |                             |
| <i>Andrena iliaca</i>                   | <i>Nomada succincta</i>                 |                             |
| <i>Andrena immaculata</i>               | <i>Xylocopa iris</i>                    |                             |
| <i>Andrena isabellina</i>               | <i>Anthophora rutilans</i>              |                             |
| <i>Andrena israelica</i>                | <i>Anthophora</i> sp.                   |                             |
| <i>Andrena janthina</i>                 | <i>Ceratina bifida</i>                  |                             |
| <i>Andrena melittoides</i>              | <i>Ceratina bispinosa</i>               |                             |
| <i>Andrena menahemella</i>              | <i>Ceratina chalcites</i>               |                             |
| <i>Andrena merula</i>                   | <i>Ceratina cucurbitina</i>             |                             |
| <i>Andrena Micrandrena-female-sp.</i>   |                                         |                             |
| 10                                      | <i>Ceratina dallatorreana</i>           |                             |
| <i>Andrena Micrandrena-female-sp. 2</i> | <i>Ceratina mandibularis</i>            |                             |
| <i>Andrena Micrandrena-female-sp. 3</i> | <i>Ceratina moricei</i>                 |                             |

|                                         |                                                 |
|-----------------------------------------|-------------------------------------------------|
| <i>Andrena Micrandrena-female-sp. 4</i> | <i>Ceratina parvula</i>                         |
| <i>Andrena Micrandrena-female-sp. 5</i> | <i>Ceratina schwarzi</i>                        |
| <i>Andrena Micrandrena-female-sp. 9</i> | <i>Eucera albofasciata</i>                      |
| <i>Andrena Micrandrena-male-sp. 11</i>  | <i>Eucera caerulescens</i>                      |
| <i>Andrena Micrandrena-male-sp. 12</i>  | <i>Eucera cf. Clypeata</i>                      |
| <i>Andrena Micrandrena-male-sp. 13</i>  | <i>Eucera cf. edentata</i>                      |
| <i>Andrena Micrandrena-male-sp. 14</i>  | <i>Eucera cf. maxima</i>                        |
| <i>Andrena Micrandrena-male-sp. 15</i>  | <i>Eucera cf. obsoleta</i>                      |
| <i>Andrena mucronata/mizorhina</i>      | <i>Eucera cf. sinufascia</i><br>(=penicillata)  |
| <i>Andrena nisoria</i>                  | <i>Eucera cinnamomea</i>                        |
| <i>Andrena nitidiuscula nigellata</i>   | <i>Eucera clypeata</i>                          |
| <i>Andrena nubica</i>                   | <i>Eucera cubitalia parvicornis</i>             |
| <i>Andrena oedictema</i>                | <i>Eucera curvitaris</i>                        |
| <i>Andrena orientana</i>                | <i>Eucera cypria</i>                            |
| <i>Andrena palaestina</i>               | <i>Eucera decipiens</i>                         |
| <i>Andrena panurgimorpha</i>            | <i>Eucera ebmeri</i>                            |
| <i>Andrena pinkeunia</i>                | <i>Eucera edentata</i>                          |
| <i>Andrena rufomaculata</i>             | <i>Eucera friesei</i>                           |
| <i>Andrena sedumella</i>                | <i>Eucera gaullei</i>                           |
| <i>Andrena sigiella</i>                 | <i>Eucera grozdanici</i>                        |
| <i>Andrena similis</i>                  | <i>Eucera kullenbergi</i>                       |
| <i>Andrena speciosa</i>                 | <i>Eucera laxiscopa</i>                         |
| <i>Andrena sphecodimorpha</i>           |                                                 |
| <i>mediterranea</i>                     | <i>Eucera lucasi</i>                            |
| <i>Andrena statuta</i>                  | <i>Eucera major</i>                             |
| <i>Andrena tadauchii</i>                | <i>Eucera maxima</i>                            |
| <i>Andrena truncatilabris</i>           | <i>Eucera microsoma</i>                         |
| <i>Andrena ungeri</i>                   | <i>Eucera</i><br><i>nigrifacies/penicollata</i> |
| <i>Andrena uncinata</i>                 | <i>Eucera nigrilabris</i>                       |
| <i>Andrena urfanella</i>                | <i>Eucera obsoleta</i>                          |
| <i>Andrena vetula</i>                   | <i>Eucera paraclypeata</i>                      |
| <i>Andrena wilhelmi</i>                 | <i>Eucera parvicornis</i>                       |
| <i>Andrena wolffi</i>                   | <i>Eucera penicillata</i>                       |
| <i>Clavipanurgus orientalis</i>         | <i>Eucera plumigera</i>                         |
| <i>Melitturga sp.</i>                   | <i>Eucera proxima</i>                           |
| <i>Panurginus female-sp.2</i>           | <i>Eucera pseudeucnemidae</i>                   |
| <i>Panurginus male-sp.1</i>             | <i>Eucera rhodia</i>                            |
| <i>Panurginus sp.</i>                   | <i>Eucera sinufascia</i><br>(=penicillata)      |
| <i>Panurginus turcomanicus</i>          |                                                 |
| <i>Panurgus posticus</i>                |                                                 |

---

## Halictidae

*Halictus berlandi*

---

## Megachilidae

*Afranthidium lebanense*

*Halictus resurgens*  
*Halictus tetrazonianellus*  
*Lasioglossum aegyptiellum*  
*Lasioglossum aff. morio*  
*Lasioglossum anellum*  
*Lasioglossum clypeiferellum*  
*Lasioglossum epipygiale*  
*Lasioglossum glabriusculum*  
*Lasioglossum imbecillum*  
*Lasioglossum israelense*  
*Lasioglossum lineare*  
*Lasioglossum malachurum*  
*Lasioglossum mamdilulae*  
*Lasioglossum marginatum*  
*Lasioglossum mesosclerum*  
*Lasioglossum nigripes pharaonis*  
*Lasioglossum obscuratum*  
*Lasioglossum politum atomarium*  
*Lasioglossum pseudosphecodimorphum*  
*Lasioglossum pygmaeum*  
*Lasioglossum sp.*  
*Lasioglossum tadschicum*  
*Lasioglossum truncaticolle*  
*Lasioglossum vagans*  
*Nomioidinae*  
*Rophites nigripes*  
*Seladonia cephalica*  
*Sphecodes rubicundes*  
*Systropha planidens*

*Anthidium dalmaticum*  
*Anthidium diadema*  
*Anthidium punctatum*  
*Chelostoma diodon*  
*Chelostoma isabellinum*  
*Chelostoma mocsaryi*  
*Chelostoma spec. 24*  
*Chelostoma spec. 3*  
*Hoplitis acuticornis*  
*Hoplitis anipuncta*  
*Hoplitis antalyiae*  
*Hoplitis cf. obtusa*  
*Hoplitis cf. serainae*  
*Hoplitis cypriaca*  
*Hoplitis hierichonica*  
*Hoplitis onychophora*  
*Hoplitis pallicornis*  
*Hoplitis praestans*  
*Hoplitis serainae*  
*Hoplitis sp.*  
*Hoplitis unispina*  
*Megachile giraudi*  
*Megachile manicata*  
*Osmia cephalotes*  
*Osmia cyanoxantha*  
*Osmia dives*  
*Osmia erythrogastra*  
*Osmia latreillei*  
*Osmia ligurica*  
*Osmia nana*  
*Osmia niveata*  
*Osmia rufohirta*

*Osmia rufotibialis*  
*Osmia scutellaris*  
*Osmia signata*  
*Osmia subcornuta*  
*Osmia teunissenii*  
*Osmia viridana*  
*Protosmia sp.*  
*Protosmia angustimandibulae*  
*Protosmia paradoxa*  
*Protosmia spec. ("humeralis")*  
*Rhodanthidium septemdentatum*  
*Stenoheriades levantica*
